# Supplementary material
Source: PubMed Central journal article supplement (PMC2823531)
Supplement: supp_M109.065672_jbc.M109.065672-1.pdf [file supp_M109.065672_jbc.M109.065672-1.pdf]

**NMR Structure of Pardaxin, a Pore-Forming Antimicrobial Peptide, in Lipopolysaccharide Micelles: Mechanism of Outer Membrane Permeabilization**

**Anirban Bhunia<sup>1</sup>, Prerna N Domadia<sup>1</sup>, Jaume Torres<sup>1</sup>, Kevin J. Hallock,<sup>2</sup> Ayyalusamy Ramamoorthy<sup>2</sup>, Surajit Bhattacharjya<sup>1</sup>**

<sup>1</sup>School of Biological Sciences, Division of Structural and Computational Biology, Nanyang Technological University, Singapore 637551. <sup>2</sup>Department of Chemistry and Biophysics, University of Michigan, Ann Arbor, Michigan 48109-1055, U.S.A.

Running head: NMR Structure of Pardaxin in LPS.

#Address correspondence to: Surajit Bhattacharjya, 60 Nanyang Drive, Singapore, 637551, e-mail: surajit@ntu.edu.sg, Fax: 65-6791-3856, or Ayyalusamy Ramamoorthy, University of Michigan, Ann Arbor, Michigan, e-mail: ramamoor@umich.edu, Fax: 734-763-2307

**Figure S1**

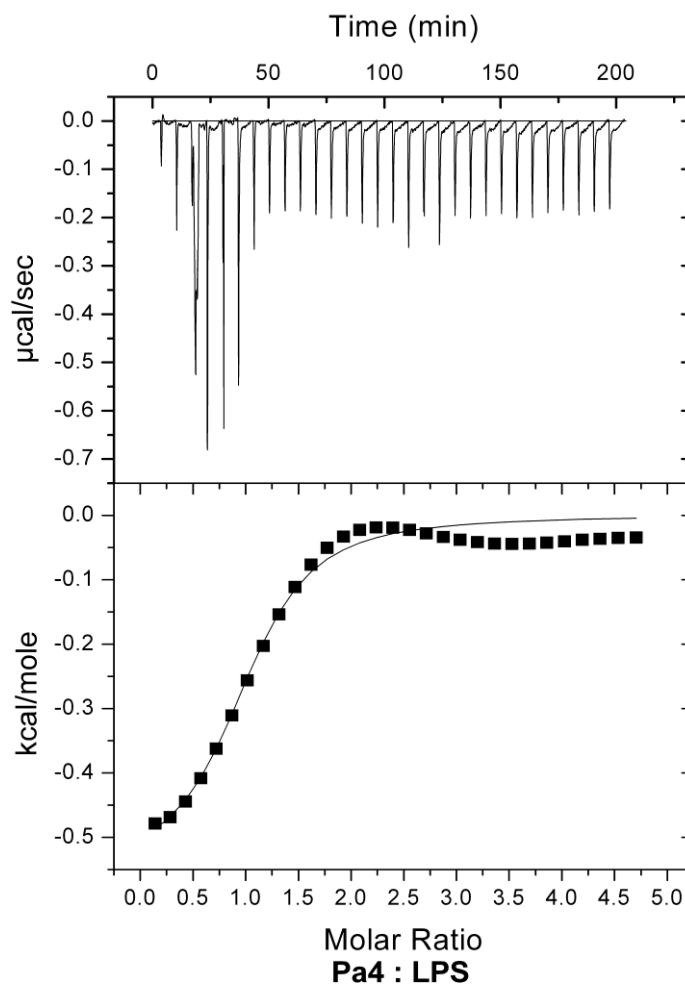

**Figure S1:** Calorimetric trace of 1 mM Pa4 titrated into 0.05 mM *E. coli* lipopolysaccharide 0111:B4 in 10 mM sodium phosphate, pH 6.2 is shown at 313 K. The upper panel shows the titrated peaks plotted as power ( $\mu\text{cal s}^{-1}$ ) against time (min). The lower panel shows the corresponding integrated heats of the binding

**Figure S2**

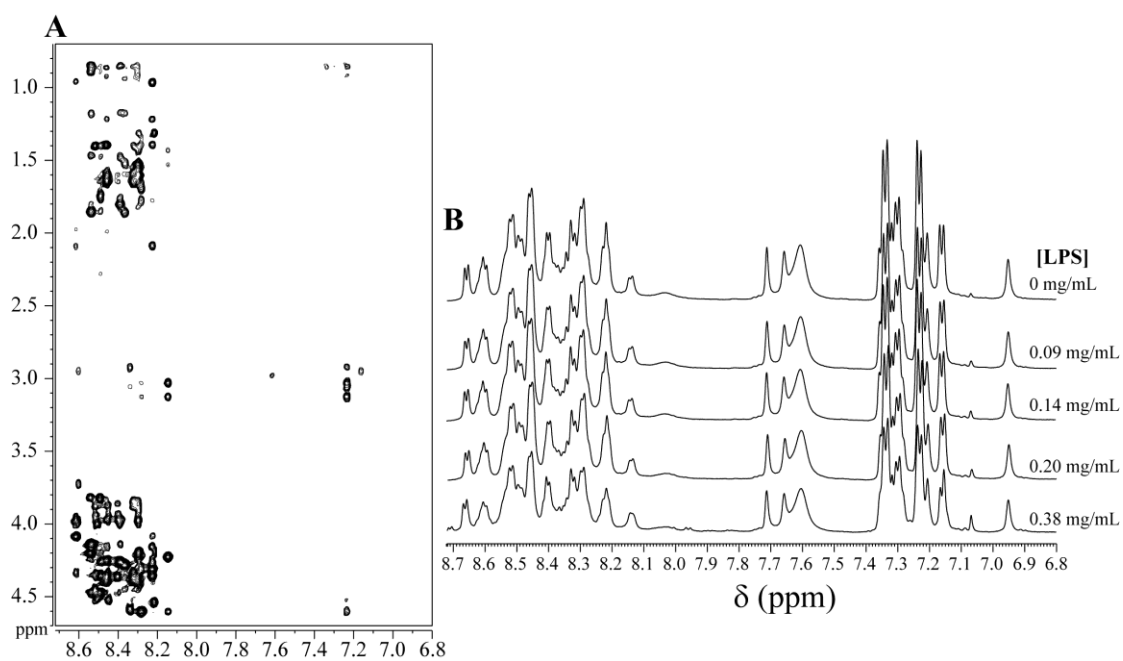

**Figure S2:** (panel A) Two-dimensional  $^1\text{H}$ - $^1\text{H}$  NOESY spectrum of Pa4 in free solution showing NOE connectivities from low field shifted amide/aromatic  $^1\text{H}$  resonances with aliphatic  $^1\text{H}$  resonances. (panel B) The low field region of one-dimensional  $^1\text{H}$  NMR spectra of Pa4 in the presence of different concentrations (shown in right side) of LPS. The experiments were performed at 600 MHz and at 288 K.

**Table S1**

<sup>1</sup>H Chemical shifts (in ppm) of the amino acid residues of Pa4 (90% H<sub>2</sub>O, 10% D<sub>2</sub>O), pH 4.5 at 288K. Chemical shifts were referenced to DSS.

| Residue | H <sub>N</sub> | H <sub>α</sub> | H <sub>β1</sub> , H <sub>β2</sub> | H <sub>γ</sub> | H <sub>δ</sub>  | Others                                                                                      |
|---------|----------------|----------------|-----------------------------------|----------------|-----------------|---------------------------------------------------------------------------------------------|
| G1      | -              | 3.728          |                                   |                |                 |                                                                                             |
| F2      | 8.600          | 4.598          | 2.955                             |                |                 | 2,6H: 7.234<br>3,5H: 7.334<br>4H: 7.300                                                     |
| F3      | 8.337          | 4.545          | 3.061, 2.929                      |                |                 | 2,6H: 7.234<br>3,5H: 7.334<br>4H: 7.300                                                     |
| A4      | 8.216          | 4.204          | 1.318                             |                |                 |                                                                                             |
| L5      | 8.296          | 4.288          | 1.604                             |                | 0.924           |                                                                                             |
| I6      | 8.364          | 4.454          | 1.865                             | 1.183, 0.918   | 0.860           |                                                                                             |
| P7      | -              | -              | 2.285                             | 2.016, 1.971   | 3.712           |                                                                                             |
| K8      | 8.491          | 4.269          | 1.755                             | 1.479          |                 | C <sup>ε</sup> H <sub>2</sub> : 2.996<br>N <sup>ε</sup> H <sub>3</sub> <sup>+</sup> : 7.611 |
| I9      | 8.388          | 4.146          | 1.813                             | 1.171          | 0.858           |                                                                                             |
| I10     | 8.538          | 4.207          | 1.865                             | 1.472, 1.186   | 0.900           |                                                                                             |
| S11     | 8.542          | 4.476          | 3.829                             |                |                 |                                                                                             |
| S12     | 8.400          | 4.479          | 3.869                             |                |                 |                                                                                             |
| P13     | -              | -              | 2.259                             | 2.016, 1.843   | 3.776           |                                                                                             |
| L14     | 8.300          | 4.234          | 1.536                             |                | 0.859           |                                                                                             |
| F15     | 8.145          | 4.608          | 3.132, 3.041                      |                |                 | 2,6H: 7.237<br>3,5H: 7.341<br>4H: 7.305                                                     |
| K16     | 8.282          | 4.317          | 1.782                             | 1.390          | 1.430           | C <sup>ε</sup> H <sub>2</sub> : 2.981<br>N <sup>ε</sup> H <sub>3</sub> <sup>+</sup> : 7.611 |
| T17     | 8.224          | 8.258          | 4.162                             | 1.222          |                 |                                                                                             |
| L18     | 8.457          | 4.364          | 1.612                             |                | 0.867,<br>0.929 |                                                                                             |
| L19     | 8.299          | 4.370          | 1.651                             |                | 0.866           |                                                                                             |
| S20     | 8.403          | 4.471          | 3.933                             |                |                 |                                                                                             |
| A21     | 8.459          | 4.369          | 1.398                             |                |                 |                                                                                             |
| V22     | 8.224          | 4.088          | 2.093                             | 0.961          |                 |                                                                                             |
| G23     | 8.615          | 3.983          |                                   |                |                 |                                                                                             |
| S24     | 8.299          | 4.457          | 3.857                             |                |                 |                                                                                             |
| A25     | 8.517          | 4.351          | 1.406                             |                |                 |                                                                                             |
| L26     | 8.321          | 1.648          |                                   |                | 0.933           |                                                                                             |
| S27     | 8.465          | 4.512          | 3.882                             |                |                 |                                                                                             |
| S28     | 8.517          | 4.533          | 3.883                             |                |                 |                                                                                             |
| S29     | 8.491          | 4.263          | 3.832                             |                |                 |                                                                                             |
| G30     | 8.508          | 4.003          |                                   |                |                 |                                                                                             |
| G31     | 8.397          | 3.971          |                                   |                |                 |                                                                                             |
| Q32     | 8.457          | 4.400          | 1.999                             | 2.356          |                 |                                                                                             |
| E33     | 8.301          | 4.403          | 2.139                             | 2.366          |                 |                                                                                             |
